# Supplementary material for: Controlled synthesis of 2D–2D conductive metal–organic framework/g-C3N4 heterojunctions for efficient photocatalytic hydrogen evolution
Source: Royal Society of Chemistry journal article supplement (doi:10.1039/d3dt03894g), 2024-01-01
Supplement: d3dt03894g1.pdf [file d3dt03894g1.pdf]

Electronic Supplementary Material (ESI) for Dalton Transactions.  
This journal is © The Royal Society of Chemistry 2023

## Supporting Information

### **Controlled Synthesis of 2D-2D Conductive Metal-Organic Frameworks/g-C<sub>3</sub>N<sub>4</sub> Heterojunctions for Efficient Photocatalytic Hydrogen Evolution**

Xiaoyu Chu,<sup>a,b,\*</sup> Bing-Bing Luan,<sup>a</sup> Ao-Xiang Huang,<sup>a</sup> Yongkuo Zhao,<sup>a</sup> Hongxia Guo,<sup>a</sup> Yang Ning,<sup>a</sup> Haojian Cheng,<sup>b</sup>  
Guiling Zhang,<sup>a,\*</sup> Feng-Ming Zhang<sup>a,\*</sup>

<sup>a</sup> Heilongjiang Provincial Key Laboratory of CO<sub>2</sub> Resource Utilization and Energy Catalytic Materials, School of Material Science and Chemical Engineering, Harbin University of Science and Technology, 52 Xue Fu Road, Harbin, Heilongjiang 150080, P. R. China

<sup>b</sup> Yongkang Jiaxiao Electric Welding Automation Equipment Co. Ltd, Jinhua, Zhejiang P. R. China

## 1. Experimental details

### 1.1 Photoelectrochemical and electrochemical measurements

The Mott-Schottky plot (M-S), transient photocurrent spectra (I-T) and electrochemical impedance spectra (EIS) were recorded on the CHI660E electrochemical workstation with a standard three-electrode system with the photocatalyst-coated ITO as the working electrode, Pt plate as the counter electrode, and a saturated calomel electrode as a reference electrode. The test samples (2 mg) were added to 1ml ethanol and 10  $\mu$ L Nation, and then sonicated for a while. The working electrodes were prepared by dropping the suspension (200  $\mu$ L) onto an ITO glass substrate electrode surface and dried at room temperature. The electrochemical test process selects 0.25 M  $\text{Na}_2\text{SO}_4$  solution as the electrolyte solution and A 300 W Xenon lamp with a 420 nm cut-off filter as the light source.

### 1.2 Photocatalytic performance measurements

A sealed system that is composed of a quartz tube and a sealed system was charged with Ni-CAT-1/g- $\text{C}_3\text{N}_4$  nanosheet (10 mg), 100  $\mu$ L  $\text{H}_2\text{PtCl}_6$  solution (3 wt%) as a co-catalyst, 100 mg of sodium ascorbate (SA) as the holes sacrificial agent and 50 mL PBS buffer solution and then mixture was sonicated for 5 min. The whole photocatalytic test is controlled at 10°C and irradiated with a 300 W Xe lamp (>420 nm) to achieve photocatalytic hydrogen production. The hydrogen evolution is detected by a gas chromatograph (GC7920, thermal conductivity detector (TCD), Ar carrier gas).

## 2. Supplementary Figures and Tables

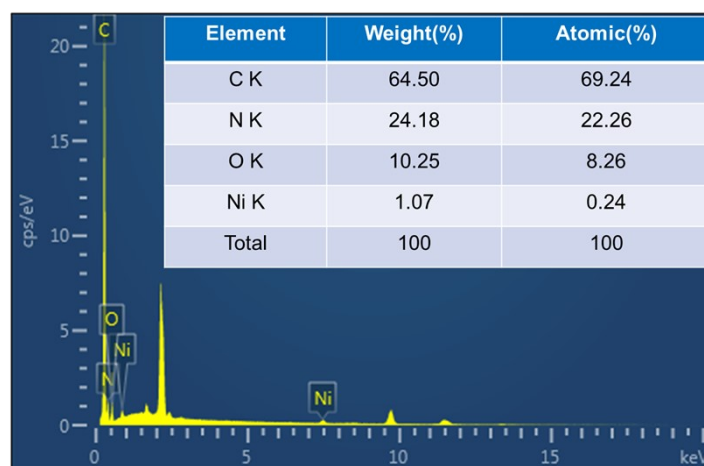

**Figure S1** EDS spectra and element content of Ni-CAT-1/g- $\text{C}_3\text{N}_4$  composites.

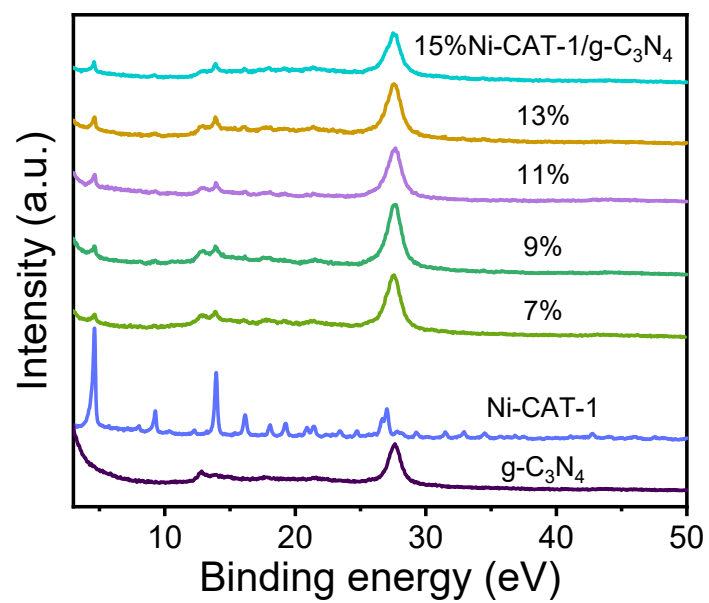

**Figure S2** The XRD patterns of a series of Ni-CAT-1/g-C<sub>3</sub>N<sub>4</sub> composites.

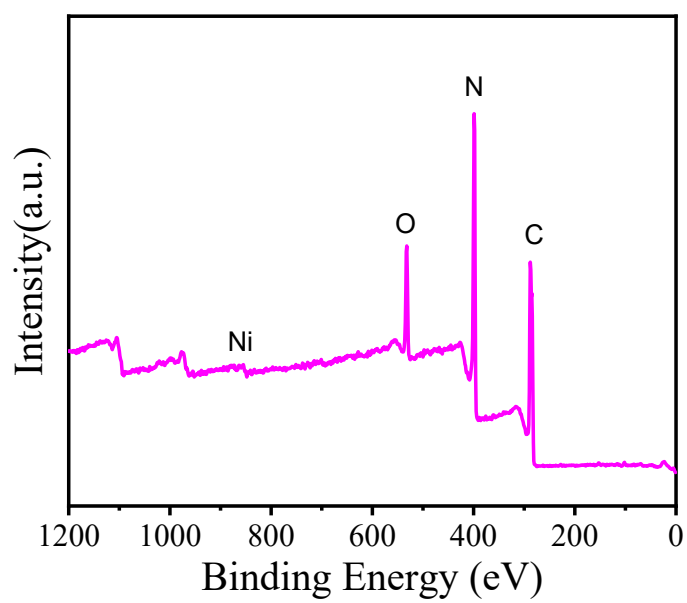

**Figure S3** XPS survey spectrum of Ni-CAT-1/g-C<sub>3</sub>N<sub>4</sub> composites.

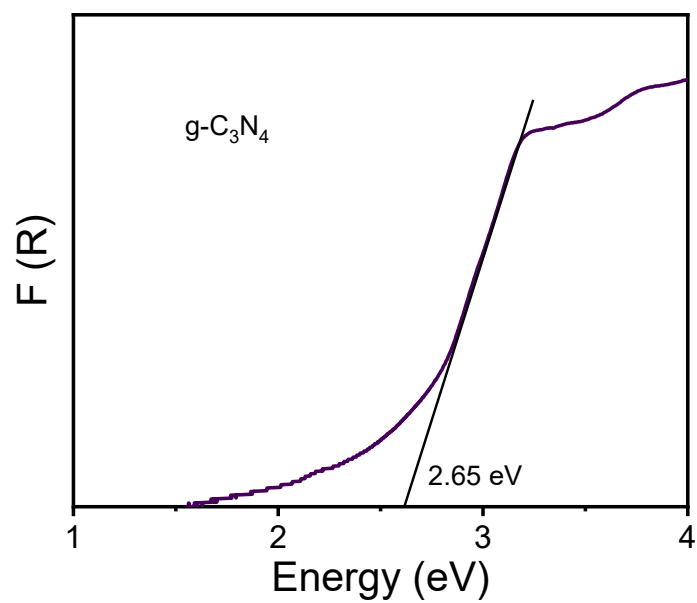

**Figure S4** Tauc plots of g-C<sub>3</sub>N<sub>4</sub>.

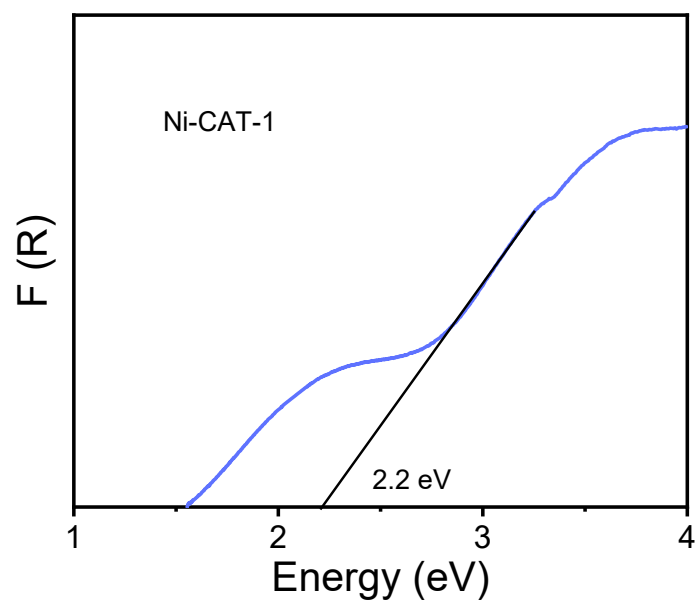

**Figure S5** Tauc's plots of Ni-CAT-1.

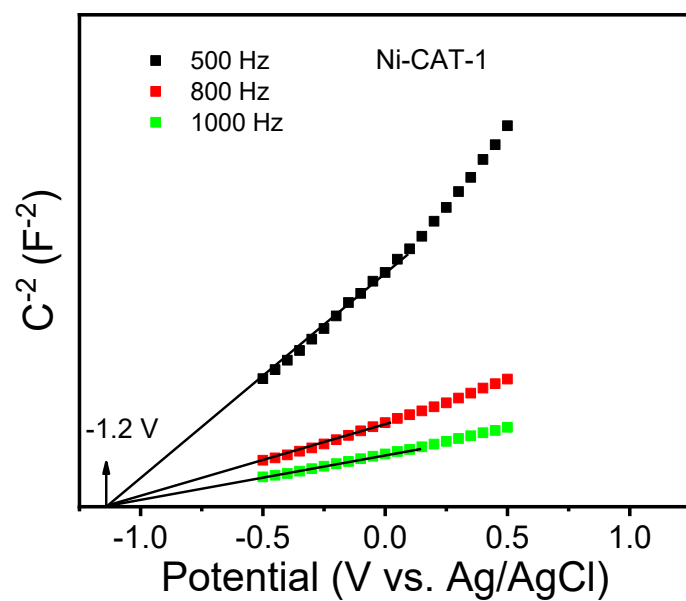

**Figure S6** Mott-Schottky plot of Ni-CAT-1.

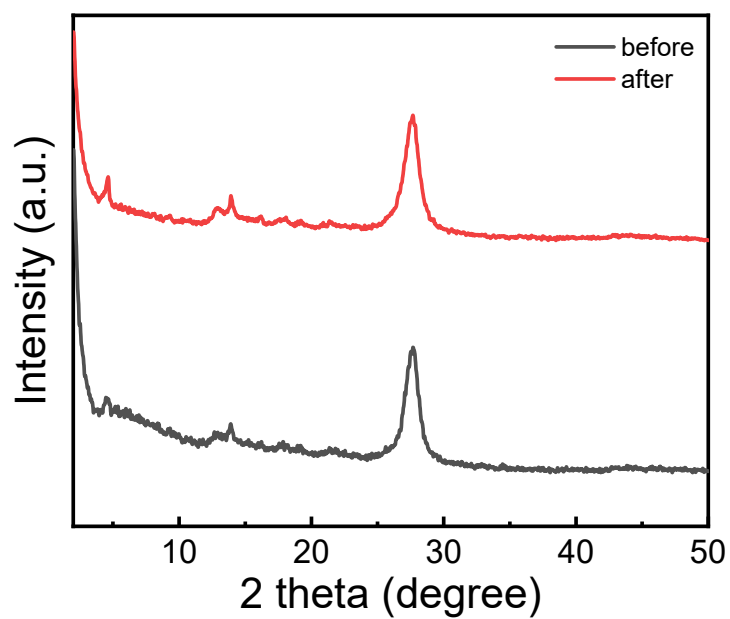

**Figure S7** PXRD patterns of Ni-CAT-1/g-C<sub>3</sub>N<sub>4</sub> composites before and after photocatalysis.

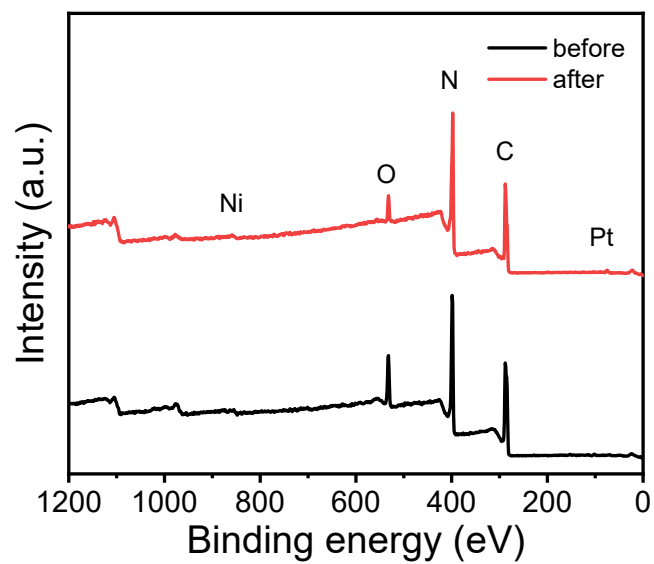

**Figure S8** XPS survey spectrum of Ni-CAT-1/g-C<sub>3</sub>N<sub>4</sub> composites before and after photocatalysis.

**Table S1** Comparison of Photocatalytic Hydrogen Evolution Performance with Literature Reports

| Catalyst                                                         | Sacrificial agent | Co-catalyst | Light source                     | HER (mmol g <sup>-1</sup> h <sup>-1</sup> ) | Refs      |
|------------------------------------------------------------------|-------------------|-------------|----------------------------------|---------------------------------------------|-----------|
| PAN/g-C <sub>3</sub> N <sub>4</sub>                              | TEOA              | Pt          | 300 W Xe lamp (λ > 400 nm)       | 0.37                                        | 1         |
| g-C <sub>3</sub> N <sub>4</sub> /PDI                             | AA                | Pt          | 300 W Xe lamp (λ ≥ 420 nm)       | 1.65                                        | 2         |
| 5N-PTEtOH/g-C <sub>3</sub> N <sub>4</sub>                        | TEOA              | Pt          | 300 W Xe lamp (λ ≥ 420 nm)       | 2.424                                       | 3         |
| PCzF/g-C <sub>3</sub> N <sub>4</sub>                             | TEOA              | Pt          | 300 W Xe lamp (λ ≥ 420 nm)       | 0.628                                       | 4         |
| C <sub>3</sub> N <sub>4</sub> -PEDOT                             | TEA               | Pt          | high energy Xe lamp (λ > 400 nm) | 0.327                                       | 5         |
| 1NP-3Mg-CN                                                       | TEOA              | Pt          | 300 W Xe lamp (λ ≥ 420 nm)       | 1.496                                       | 6         |
| BP/A-CN                                                          | TEOA              | Pt          | 300 W Xe lamp (λ ≥ 420 nm)       | 0.86                                        | 7         |
| Zr-MOF/g-C <sub>3</sub> N <sub>4</sub>                           | AA                | Pt          | 300 W Xe lamp (λ ≥ 420 nm)       | 1.252                                       | 8         |
| TAPT/CN                                                          | TEOA              | Pt          | 300 W Xe lamp (λ ≥ 420 nm)       | 1.98                                        | 9         |
| CCN                                                              | TEOA              | Pt          | 300 W Xe lamp (λ ≥ 400 nm)       | 1.224                                       | 10        |
| UCNs                                                             | TEOA              | Pt          | 300 W Xe lamp (λ ≥ 400 nm)       | 2.59                                        | 11        |
| W <sub>18</sub> O <sub>49</sub> /g-C <sub>3</sub> N <sub>4</sub> | TEOA              | Pt          | 300 W Xe lamp (λ ≥ 420 nm)       | 0.912                                       | 12        |
| 5PPFBT/CN-OH                                                     | TEOA              | Pt          | 300 W Xe lamp (λ ≥ 420 nm)       | 2.662                                       | 13        |
| Ni-CAT-1/g-C <sub>3</sub> N <sub>4</sub>                         | SA                | Pt          | 300 W Xe lamp (λ ≥ 420 nm)       | 2.76                                        | This work |

**References:**

- 1 F. He, G. Chen, Y. Yu, S. Hao, Y. Zhou and Y. Zheng, *ACS Appl. Mater. Interfaces*, 2014, **6**, 7171–7179.
- 2 H. Miao, J. Yang, Y. Sheng, W. Li and Y. Zhu, *Solar RRL*, 2021, **5**, 2000453.
- 3 Q. Zhao, Y. Li, K. Hu, X. Guo, Y. Qu, Z. Li, F. Yang, H. Liu, C. Qin and L. Jing, *ACS Sustainable Chem. Eng.*, 2021, **9**, 7306–7317.
- 4 J. Chen, C.-L. Dong, D. Zhao, Y.-C. Huang, X. Wang, L. Samad, L. Dang, M. Shearer, S. Shen and L. Guo, *Advanced Materials*, 2017, **29**, 1606198.

- 5 Z. Xing, Z. Chen, X. Zong and L. Wang, *Chem. Commun.*, 2014, **50**, 6762–6764.
- 6 X. Guo, K. Hu, M. Chu, Y. Li, J. Bian, Y. Qu, X. Chu, F. Yang, Q. Zhao, C. Qin and L. Jing, *ChemSusChem*, 2020, **13**, 3707–3717.
- 7 M. H. Suhag, H. Katsumata, I. Tateishi, M. Furukawa and S. Kaneco, *Langmuir*, 2023, **39**, 13121–13131.
- 8 H. Xing, J. Shi, W. Yang, Y. Li, R. Wu and J. Wu, *New J. Chem.*, 2023, **47**, 21685–21691.
- 9 C.-C. Li, I. Ullah, G. Wang and A.-W. Xu, *Catal. Sci. Technol.*, 2023, **13**, 5456–5461.
- 10 E. Liu, X. Lin, Y. Hong, L. Yang, B. Luo, W. Shi and J. Shi, *Renewable Energy*, 2021, **178**, 757–765.
- 11 L. Wang, Y. Hong, E. Liu, X. Duan, X. Lin and J. Shi, *Carbon*, 2020, **163**, 234–243.
- 12 A. Li, Z. Peng and X. Fu, *Solid State Sciences*, 2020, **106**, 106298.
- 13 X. Pang, Y. Li, X. Wu, B. Zhang, M. Hao, Y. Zhu, Y. Zhang, C. Qin, H. Zhan and C. Qin, *Journal of Colloid and Interface Science*, 2023, **652**, 1405–1416.
